# Supplementary material for: Arsenic Speciation and Extraction and the Significance of Biodegradable Acid on Arsenic Removal—An Approach for Remediation of Arsenic-Contaminated Soil
Source: MDPI journal article supplement (doi:10.3390/ijerph14090990), 2017-08-31
Supplement: s1 [file s1]

## Supplementary Data

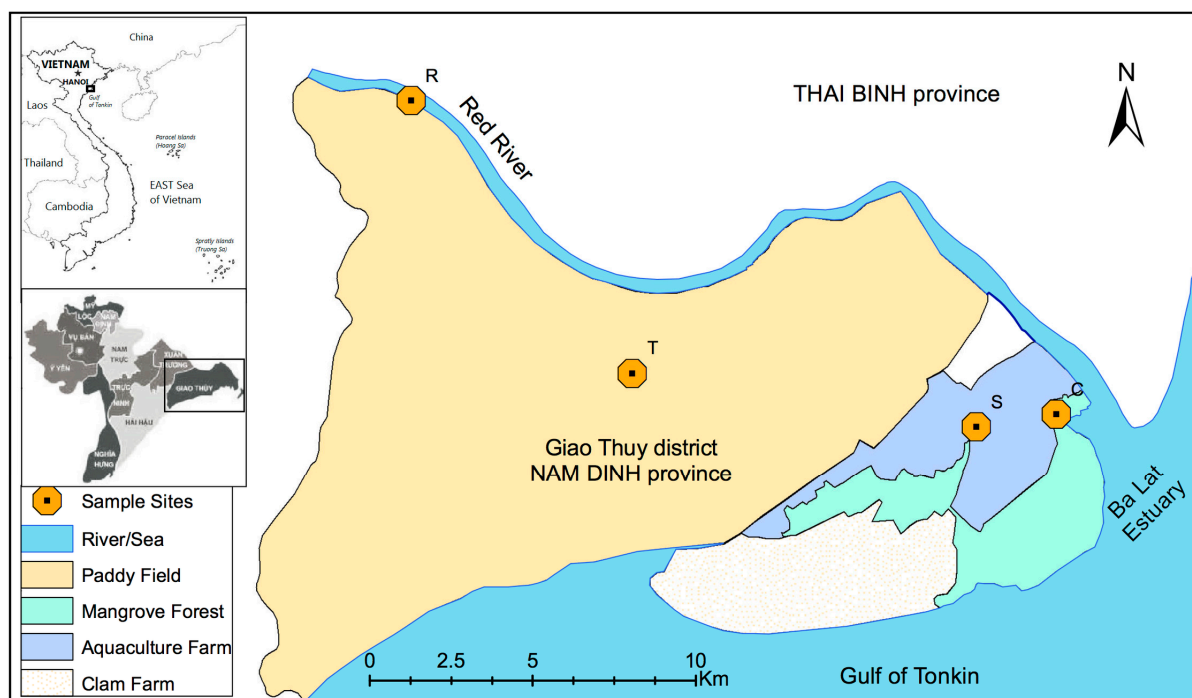

**Figure S1.** Study area and sample sites in Ba-Lat estuary, Vietnam (R: River sediment, C: Mangrove forest soil, T: Paddy soil, S: Aquaculture sediment).

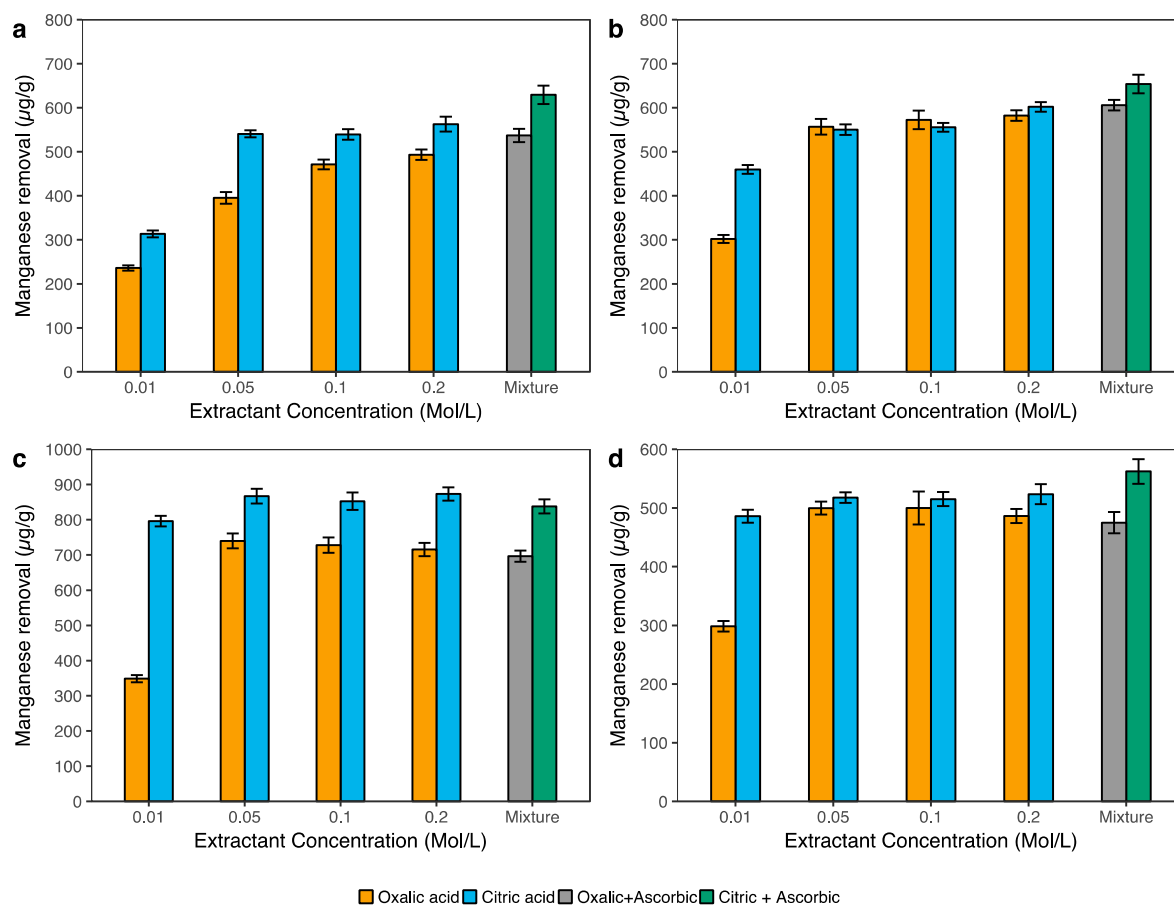

**Figure S2.** Extracted manganese under the effect of oxalic and citric acid in various concentrations (from 0.1 M to 0.2 M), and the combination of 0.1 M ascorbic with 0.2 M oxalic acid, and the combination of 0.1 M ascorbic with 0.2 M citric acid in river bed sediment (a), mangrove forest soil (b), paddy soil (c) and aquaculture farm sediment (d).

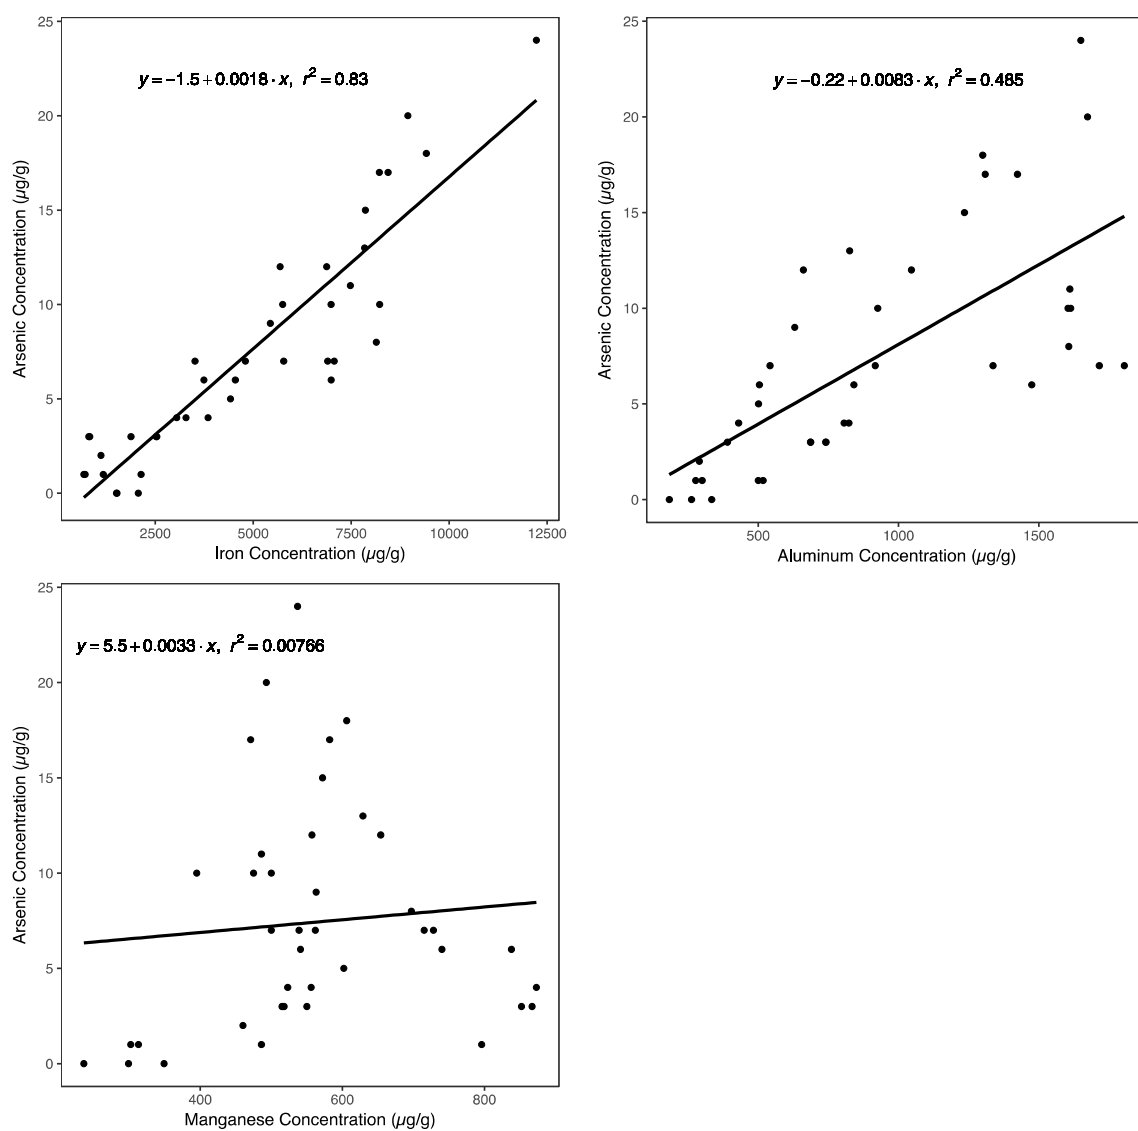

**Figure S3.** The relationship between extracted arsenic and extracted iron, aluminum and manganese under the effect of oxalic, citric and combination of these acids with ascorbic acid in four soil samples.
